# Supplementary material
Source: MDPI journal article supplement (https://www.mdpi.com/2673-5172/5/1/27)
Supplement: s1 [file s1]

## Clusters of Sources: Political Journalists

| Gender | Hashtag         | Category | n   | Share in percent (of total in gender) |
|--------|-----------------|----------|-----|---------------------------------------|
| f      | saechsischede   | media    | 351 | 5.25                                  |
| f      | matthiasdaum    | pol_jor  | 292 | 4.37                                  |
| f      | sz              | media    | 259 | 3.88                                  |
| f      | olaferseman     | pol_jor  | 225 | 3.37                                  |
| f      | zeitonline      | media    | 194 | 2.90                                  |
| f      | tagesspiegel    | media    | 171 | 2.56                                  |
| f      | derspiegel      | media    | 159 | 2.38                                  |
| f      | tazgezwitscher  | media    | 149 | 2.23                                  |
| f      | djuverdi        | ngo      | 149 | 2.23                                  |
| f      | rponline        | media    | 138 | 2.07                                  |
| f      | investigativ_de | media    | 114 | 1.71                                  |
| f      | faznet          | media    | 105 | 1.57                                  |
| f      | mkraju          | pol_jor  | 91  | 1.36                                  |
| f      | ulrichschulte   | pol_jor  | 87  | 1.30                                  |
| f      | karl_lauterbach | politic  | 81  | 1.21                                  |
| f      | newwork_wandel  | media    | 78  | 1.17                                  |
| f      | antonrainer     | pol_jor  | 78  | 1.17                                  |
| f      | beimwort        | pol_jor  | 78  | 1.17                                  |
| f      | mkreutzfeldt    | pol_jor  | 77  | 1.15                                  |
| f      | evaquadbeck     | pol_jor  | 75  | 1.12                                  |
| f      | mathieuvonrohr  | pol_jor  | 74  | 1.11                                  |
| f      | faz_wirtschaft  | media    | 68  | 1.02                                  |
| f      | matthiasmeisner | pol_jor  | 68  | 1.02                                  |
| f      | zeitonline_pol  | media    | 67  | 1.00                                  |
| f      | mx3_online      | media    | 66  | 0.99                                  |
| f      | faz_politik     | media    | 65  | 0.97                                  |
| f      | heinrichwefing  | pol_jor  | 65  | 0.97                                  |
| f      | alicebota       | pol_jor  | 64  | 0.96                                  |
| f      | weltamsonntag   | media    | 63  | 0.94                                  |
| f      | rnd_de          | media    | 62  | 0.93                                  |
| f      | akm0803         | pol_jor  | 62  | 0.93                                  |
| f      | twobserve       | pol_jor  | 62  | 0.93                                  |

| Gender | Hashtag         | Category      | n  | Share in percent (of total in |
|--------|-----------------|---------------|----|-------------------------------|
|        |                 |               |    | gender)                       |
| f      | faz_net         | media         | 61 | 0.91                          |
| f      | faz_top         | media         | 60 | 0.90                          |
| f      | konradlitschko  | pol_jor       | 60 | 0.90                          |
| f      | ard_presseclub  | media         | 58 | 0.87                          |
| f      | matthias_kamann | pol_jor       | 58 | 0.87                          |
| f      | braunetim       | pol_jor       | 57 | 0.85                          |
| f      | diezeit         | media         | 55 | 0.82                          |
| f      | holgermoehle    | pol_jor       | 55 | 0.82                          |
| f      | robinalexander_ | pol_jor       | 55 | 0.82                          |
| f      | juliusbetschka  | pol_jor       | 54 | 0.81                          |
| f      | janaawolf       | pol_jor       | 53 | 0.79                          |
| f      | vmedick         | pol_jor       | 53 | 0.79                          |
| f      | berlinernotizen | pol_jor       | 52 | 0.78                          |
| f      | sjggi           | pol_jor       | 50 | 0.75                          |
| f      | ver_jorg        | ngo           | 48 | 0.72                          |
| f      | sturmdaniel     | pol_jor       | 48 | 0.72                          |
| f      | ulfposh         | pol_jor       | 48 | 0.72                          |
| f      | floriangathmann | pol_jor       | 47 | 0.70                          |
| f      | hand_aufs_hirn  | pol_jor       | 47 | 0.70                          |
| f      | danieldrepper   | nonpol_jor    | 46 | 0.69                          |
| f      | jandrebes       | pol_jor       | 46 | 0.69                          |
| f      | aniesmann       | pol_jor       | 45 | 0.67                          |
| f      | manuelbewarder  | pol_jor       | 45 | 0.67                          |
| f      | mmachowecz      | pol_jor       | 45 | 0.67                          |
| f      | teresabuecker   | pol_jor       | 44 | 0.66                          |
| f      | washingtonpost  | foreign_media | 42 | 0.63                          |
| f      | christianfuchs_ | pol_jor       | 42 | 0.63                          |
| f      | felixhuesmann   | pol_jor       | 42 | 0.63                          |
| f      | glocalreporting | pol_jor       | 42 | 0.63                          |
| f      | nytimes         | foreign_media | 41 | 0.61                          |
| f      | ronzheimer      | pol_jor       | 41 | 0.61                          |
| f      | sefi99          | pol_jor       | 41 | 0.61                          |
| f      | phoenix_de      | media         | 40 | 0.60                          |
| f      | weserkurier     | media         | 40 | 0.60                          |

| Gender | Hashtag         | Category   | n  | Share in percent (of total in |
|--------|-----------------|------------|----|-------------------------------|
|        |                 |            |    | gender)                       |
| f      | guessngosh      | nonpol_jor | 40 | 0.60                          |
| f      | mickybeisenherz | Others     | 39 | 0.58                          |
| f      | c_endt          | nonpol_jor | 39 | 0.58                          |
| f      | vorsamer        | nonpol_jor | 39 | 0.58                          |
| f      | wiebkehollersen | pol_jor    | 39 | 0.58                          |
| f      | radioeins       | media      | 38 | 0.57                          |
| f      | niggi           | nonpol_jor | 38 | 0.57                          |
| f      | dirkfisser      | pol_jor    | 38 | 0.57                          |
| f      | glr_berlin      | pol_jor    | 38 | 0.57                          |
| f      | lukaswallraff   | pol_jor    | 38 | 0.57                          |
| f      | martin_debes    | pol_jor    | 38 | 0.57                          |
| f      | uedio           | nonpol_jor | 37 | 0.55                          |
| f      | lebenundlassen  | pol_jor    | 37 | 0.55                          |
| f      | steffenwurzel   | pol_jor    | 37 | 0.55                          |
| f      | zekejmiller     | pol_jor    | 37 | 0.55                          |
| f      | schnellenbachj  | science    | 37 | 0.55                          |
| f      | christinaberndt | nonpol_jor | 36 | 0.54                          |
| f      | aschawe         | pol_jor    | 36 | 0.54                          |
| f      | hoshiyama       | pol_jor    | 36 | 0.54                          |
| f      | katjaberlin     | nonpol_jor | 35 | 0.52                          |
| f      | veraschroeder   | nonpol_jor | 35 | 0.52                          |
| f      | fpiatov         | pol_jor    | 35 | 0.52                          |
| f      | freiereporterin | pol_jor    | 35 | 0.52                          |
| f      | bergdame        | Others     | 34 | 0.51                          |
| f      | clemenswergin   | pol_jor    | 34 | 0.51                          |
| f      | frauasha        | Others     | 33 | 0.49                          |
| f      | nrecherche      | ngo        | 33 | 0.49                          |
| f      | juliestroeger   | nonpol_jor | 33 | 0.49                          |
| f      | martinlangeder  | pol_jor    | 33 | 0.49                          |
| f      | saezreporter    | pol_jor    | 33 | 0.49                          |
| f      | schieritz       | pol_jor    | 33 | 0.49                          |
| f      | waltrautdunz    | pol_jor    | 33 | 0.49                          |
| f      | noz_de          | media      | 32 | 0.48                          |
| f      | barbaraacherman | pol_jor    | 32 | 0.48                          |

| Gender | Hashtag         | Category      | n    | Share in percent (of total in |
|--------|-----------------|---------------|------|-------------------------------|
|        |                 |               |      | gender)                       |
| f      | hollsteinm      | pol_jor       | 32   | 0.48                          |
| f      | stefanleifert   | pol_jor       | 32   | 0.48                          |
| m      | ahval_en        | foreign_media | 2466 | 6.50                          |
| m      | bild            | media         | 1679 | 4.43                          |
| m      | sz              | media         | 1345 | 3.55                          |
| m      | bianet_eng      | foreign_media | 1223 | 3.22                          |
| m      | derspiegel      | media         | 1070 | 2.82                          |
| m      | ronzheimer      | pol_jor       | 1060 | 2.79                          |
| m      | robinalexander_ | pol_jor       | 1016 | 2.68                          |
| m      | olafgersemann   | pol_jor       | 983  | 2.59                          |
| m      | fpiatov         | pol_jor       | 697  | 1.84                          |
| m      | ulfposh         | pol_jor       | 683  | 1.80                          |
| m      | zeitonline      | media         | 617  | 1.63                          |
| m      | tazgezwitscher  | media         | 614  | 1.62                          |
| m      | faznet          | media         | 599  | 1.58                          |
| m      | a_nnaschneider  | pol_jor       | 594  | 1.57                          |
| m      | welt            | media         | 581  | 1.53                          |
| m      | weltamsonntag   | media         | 576  | 1.52                          |
| m      | faz_politik     | media         | 574  | 1.51                          |
| m      | karl_lauterbach | politic       | 555  | 1.46                          |
| m      | faz_net         | media         | 533  | 1.40                          |
| m      | schaefer_j      | pol_jor       | 501  | 1.32                          |
| m      | mathieuvonrohr  | pol_jor       | 499  | 1.32                          |
| m      | handelsblatt    | media         | 473  | 1.25                          |
| m      | bild_politik    | media         | 464  | 1.22                          |
| m      | drkissler       | pol_jor       | 451  | 1.19                          |
| m      | lokoschat       | pol_jor       | 449  | 1.18                          |
| m      | investigativ_de | media         | 403  | 1.06                          |
| m      | wahlrecht_de    | ngo           | 401  | 1.06                          |
| m      | faz_wirtschaft  | media         | 400  | 1.05                          |
| m      | florianflade    | pol_jor       | 374  | 0.99                          |
| m      | mkreutzfeldt    | pol_jor       | 373  | 0.98                          |
| m      | johannesboie    | pol_jor       | 349  | 0.92                          |
| m      | vmedick         | pol_jor       | 337  | 0.89                          |

| Gender | Hashtag         | Category      | n   | Share in percent (of total in |
|--------|-----------------|---------------|-----|-------------------------------|
|        |                 |               |     | gender)                       |
| m      | janfleischhauer | pol_jor       | 328 | 0.86                          |
| m      | duvarenglish    | foreign_media | 312 | 0.82                          |
| m      | dcremer_        | pol_jor       | 302 | 0.80                          |
| m      | lennartpfahler  | pol_jor       | 301 | 0.79                          |
| m      | tagesspiegel    | media         | 299 | 0.79                          |
| m      | ksta            | media         | 293 | 0.77                          |
| m      | volkervotsmeier | pol_jor       | 289 | 0.76                          |
| m      | berlinernotizen | pol_jor       | 286 | 0.75                          |
| m      | akm0803         | pol_jor       | 282 | 0.74                          |
| m      | bild_ruhrgebiet | media         | 279 | 0.74                          |
| m      | floriangathmann | pol_jor       | 277 | 0.73                          |
| m      | niggi           | nonpol_jor    | 265 | 0.70                          |
| m      | drumheadberlin  | pol_jor       | 261 | 0.69                          |
| m      | mdraktuell      | media         | 258 | 0.68                          |
| m      | gebauerspon     | pol_jor       | 252 | 0.66                          |
| m      | saezreporter    | pol_jor       | 250 | 0.66                          |
| m      | manuelbewarder  | pol_jor       | 249 | 0.66                          |
| m      | glr_berlin      | pol_jor       | 243 | 0.64                          |
| m      | zeitonline_pol  | media         | 239 | 0.63                          |
| m      | tobias_b        | pol_jor       | 239 | 0.63                          |
| m      | sz_topnews      | media         | 234 | 0.62                          |
| m      | besser_deniz    | pol_jor       | 234 | 0.62                          |
| m      | schmidtwolf     | pol_jor       | 232 | 0.61                          |
| m      | spiegel_alles   | media         | 231 | 0.61                          |
| m      | hasnainkazim    | pol_jor       | 229 | 0.60                          |
| m      | beimwort        | pol_jor       | 228 | 0.60                          |
| m      | juliusbetschka  | pol_jor       | 228 | 0.60                          |
| m      | michael_leh     | pol_jor       | 226 | 0.60                          |
| m      | xilefff         | pol_jor       | 226 | 0.60                          |
| m      | cdeutschlaender | pol_jor       | 225 | 0.59                          |
| m      | tim_roehn       | pol_jor       | 224 | 0.59                          |
| m      | freddy2805      | pol_jor       | 219 | 0.58                          |
| m      | auschwitzmuseum | ngo           | 217 | 0.57                          |
| m      | arminwolf       | pol_jor       | 215 | 0.57                          |

| Gender | Hashtag         | Category   | n   | Share in percent (of total in |
|--------|-----------------|------------|-----|-------------------------------|
|        |                 |            |     | gender)                       |
| m      | jsevincbasad    | pol_jor    | 214 | 0.56                          |
| m      | alicebota       | pol_jor    | 212 | 0.56                          |
| m      | rnd_de          | media      | 207 | 0.55                          |
| m      | schnellenbachj  | science    | 207 | 0.55                          |
| m      | fabiodemasi     | politic    | 204 | 0.54                          |
| m      | martin_debes    | pol_jor    | 201 | 0.53                          |
| m      | eichlerhagen    | pol_jor    | 200 | 0.53                          |
| m      | ronensteinke    | pol_jor    | 200 | 0.53                          |
| m      | janschumann_mz  | pol_jor    | 196 | 0.52                          |
| m      | matthiasmeisner | pol_jor    | 190 | 0.50                          |
| m      | birgit_kelle    | pol_jor    | 189 | 0.50                          |
| m      | saechsischede   | media      | 188 | 0.50                          |
| m      | metzold         | pol_jor    | 185 | 0.49                          |
| m      | f_obermaier     | pol_jor    | 181 | 0.48                          |
| m      | afp             | media      | 177 | 0.47                          |
| m      | diehljoerg      | nonpol_jor | 177 | 0.47                          |
| m      | tspbackgroundge | media      | 176 | 0.46                          |
| m      | martingreive    | pol_jor    | 176 | 0.46                          |
| m      | b_obermayer     | pol_jor    | 174 | 0.46                          |
| m      | polenz_r        | politic    | 173 | 0.46                          |
| m      | sz_wirtschaft   | media      | 170 | 0.45                          |
| m      | hubertus_knabe  | ngo        | 170 | 0.45                          |
| m      | aniesmann       | pol_jor    | 170 | 0.45                          |
| m      | kollenbergkai   | pol_jor    | 170 | 0.45                          |
| m      | das_micm        | pol_jor    | 169 | 0.45                          |
| m      | heikekleffner   | pol_jor    | 169 | 0.45                          |
| m      | smatthes        | pol_jor    | 169 | 0.45                          |
| m      | faz_top         | media      | 168 | 0.44                          |
| m      | bachmannrudi    | pol_jor    | 166 | 0.44                          |
| m      | sefi99          | pol_jor    | 166 | 0.44                          |
| m      | retep_kire      | pol_jor    | 164 | 0.43                          |
| m      | altenbockum     | pol_jor    | 163 | 0.43                          |
| m      | christianfuchs_ | pol_jor    | 163 | 0.43                          |
| m      | ahmadmansour__  | Others     | 162 | 0.43                          |

| Gender | Hashtag   | Category | n   | Share in percent (of total in gender) |
|--------|-----------|----------|-----|---------------------------------------|
| m      | c_drosten | science  | 162 | 0.43                                  |

### Clusters of Sources: Data Journalists

| Gender | Hashtag         | Category   | n  | Share in percent |
|--------|-----------------|------------|----|------------------|
| f      | nrecherche      | ngo        | 56 | 4.63             |
| f      | funkeinteraktiv | media      | 45 | 3.72             |
| f      | journocode      | visual     | 38 | 3.14             |
| f      | plateauton      | ddj_jor    | 37 | 3.06             |
| f      | gruenech        | politic    | 31 | 2.56             |
| f      | c_endt          | ddj_jor    | 30 | 2.48             |
| f      | danieldrepper   | nonddj_jor | 30 | 2.48             |
| f      | juliuastroeger  | ddj_jor    | 26 | 2.15             |
| f      | tagesspiegel    | media      | 24 | 1.99             |
| f      | republikmagazin | media      | 23 | 1.90             |
| f      | nzzvisuals      | media      | 20 | 1.65             |
| f      | elia_bluelle    | nonddj_jor | 20 | 1.65             |
| f      | digiges_ch      | media      | 19 | 1.57             |
| f      | sixtus          | nonddj_jor | 19 | 1.57             |
| f      | bellingscat     | media      | 18 | 1.49             |
| f      | kalkspace       | ngo        | 18 | 1.49             |
| f      | timpritleve     | Others     | 16 | 1.32             |
| f      | chelm           | ddj_jor    | 15 | 1.24             |
| f      | the_claus       | ddj_jor    | 14 | 1.16             |
| f      | tibor           | ddj_jor    | 14 | 1.16             |
| f      | br_ailab        | media      | 14 | 1.16             |
| f      | derkutter       | Others     | 13 | 1.08             |
| f      | patrickstotz    | ddj_jor    | 13 | 1.08             |
| f      | zehnsehen       | ddj_jor    | 13 | 1.08             |
| f      | tran_vominhthu  | nonddj_jor | 13 | 1.08             |
| f      | knutti_eth      | science    | 13 | 1.08             |
| f      | datentaeterin   | ddj_jor    | 12 | 0.99             |
| f      | br_data         | media      | 12 | 0.99             |
| f      | uebermedien     | media      | 12 | 0.99             |
| f      | adfichter       | nonddj_jor | 12 | 0.99             |

| Gender | Hashtag         | Category   | n  | Share in percent |
|--------|-----------------|------------|----|------------------|
| f      | ralfheimann     | nonddj_jor | 12 | 0.99             |
| f      | ij_online       | science    | 12 | 0.99             |
| f      | daten_drang     | ddj_jor    | 11 | 0.91             |
| f      | schmdjhnnnsn    | ddj_jor    | 11 | 0.91             |
| f      | gijn            | ngo        | 11 | 0.91             |
| f      | f_karig         | nonddj_jor | 11 | 0.91             |
| f      | o_kuehni        | nonddj_jor | 11 | 0.91             |
| f      | risklayer       | science    | 11 | 0.91             |
| f      | colombiafixer   | Others     | 10 | 0.83             |
| f      | miriam_vollmer  | Others     | 10 | 0.83             |
| f      | janboehm        | media      | 10 | 0.83             |
| f      | j_network       | ngo        | 10 | 0.83             |
| f      | wblau           | nonddj_jor | 10 | 0.83             |
| f      | karl_lauterbach | politic    | 10 | 0.83             |
| f      | corneliusroemer | science    | 10 | 0.83             |
| f      | davidbauer      | ddj_jor    | 9  | 0.74             |
| f      | swrpresse       | media      | 9  | 0.74             |
| f      | bayer_julia     | nonddj_jor | 9  | 0.74             |
| f      | davidgutensohn  | nonddj_jor | 9  | 0.74             |
| f      | afelia          | politic    | 9  | 0.74             |
| f      | alf_frommer     | Others     | 8  | 0.66             |
| f      | c_holler        | Others     | 8  | 0.66             |
| f      | elhotzo         | Others     | 8  | 0.66             |
| f      | s_muellerhansen | ddj_jor    | 8  | 0.66             |
| f      | zeitonline      | media      | 8  | 0.66             |
| f      | algorithmwatch  | ngo        | 8  | 0.66             |
| f      | beimwort        | nonddj_jor | 8  | 0.66             |
| f      | chrisstoecker   | nonddj_jor | 8  | 0.66             |
| f      | frauwoj         | nonddj_jor | 8  | 0.66             |
| f      | marcelsalathe_d | nonddj_jor | 8  | 0.66             |
| f      | niggi           | nonddj_jor | 8  | 0.66             |
| f      | gruene_lu       | politic    | 8  | 0.66             |
| f      | eckerleisabella | science    | 8  | 0.66             |
| f      | maxcroser       | science    | 8  | 0.66             |
| f      | engel_re        | Others     | 7  | 0.58             |



| Gender | Hashtag         | Category      | n | Share in percent |
|--------|-----------------|---------------|---|------------------|
| f      | halukamb        | ddj_jor       | 7 | 0.58             |
| f      | stekhn          | ddj_jor       | 7 | 0.58             |
| f      | br_recherche    | media         | 7 | 0.58             |
| f      | fragdenstaat    | ngo           | 7 | 0.58             |
| f      | ebertmatthias   | nonddj_jor    | 7 | 0.58             |
| f      | herr_anne       | nonddj_jor    | 7 | 0.58             |
| f      | holgi           | nonddj_jor    | 7 | 0.58             |
| f      | jasimmank       | nonddj_jor    | 7 | 0.58             |
| f      | juliusbetschka  | nonddj_jor    | 7 | 0.58             |
| f      | saraschurmann   | nonddj_jor    | 7 | 0.58             |
| f      | annalist        | politic       | 7 | 0.58             |
| f      | dave_kay        | Others        | 6 | 0.50             |
| f      | gabrielberlin   | Others        | 6 | 0.50             |
| f      | marguerite_jay  | Others        | 6 | 0.50             |
| f      | annabehrend     | ddj_jor       | 6 | 0.50             |
| f      | cacauu_de       | ddj_jor       | 6 | 0.50             |
| f      | hellocec        | ddj_jor       | 6 | 0.50             |
| f      | katjaberlin     | ddj_jor       | 6 | 0.50             |
| f      | nthelitz        | ddj_jor       | 6 | 0.50             |
| f      | philninh        | ddj_jor       | 6 | 0.50             |
| f      | schnuko         | ddj_jor       | 6 | 0.50             |
| f      | stollovo        | ddj_jor       | 6 | 0.50             |
| f      | jburnmurdoch    | foreign_media | 6 | 0.50             |
| f      | rbb24           | media         | 6 | 0.50             |
| f      | zentralplus     | media         | 6 | 0.50             |
| f      | glocalreporting | ngo           | 6 | 0.50             |
| f      | smc_germany     | ngo           | 6 | 0.50             |
| f      | andrejnalin77   | nonddj_jor    | 6 | 0.50             |
| f      | b_obermayer     | nonddj_jor    | 6 | 0.50             |
| f      | fiete_stegers   | nonddj_jor    | 6 | 0.50             |
| f      | gri_mm          | nonddj_jor    | 6 | 0.50             |
| f      | jaschensky      | nonddj_jor    | 6 | 0.50             |
| f      | larswienand     | nonddj_jor    | 6 | 0.50             |
| f      | ninabcdefghi    | nonddj_jor    | 6 | 0.50             |
| f      | pascalemller    | nonddj_jor    | 6 | 0.50             |

| Gender | Hashtag         | Category      | n   | Share in percent |
|--------|-----------------|---------------|-----|------------------|
| f      | shengfui        | nonddj_jor    | 6   | 0.50             |
| f      | sidneygennies   | nonddj_jor    | 6   | 0.50             |
| f      | svensonst       | nonddj_jor    | 6   | 0.50             |
| f      | anderageru      | politic       | 6   | 0.50             |
| m      | c_endt          | ddj_jor       | 224 | 5.62             |
| m      | smc_germany     | ngo           | 180 | 4.52             |
| m      | juliestroeger   | ddj_jor       | 145 | 3.64             |
| m      | danieldrepper   | nonddj_jor    | 85  | 2.13             |
| m      | schmdjhnsn      | ddj_jor       | 83  | 2.08             |
| m      | nzzvisuals      | media         | 83  | 2.08             |
| m      | correctiv_org   | media         | 74  | 1.86             |
| m      | patrickstotz    | ddj_jor       | 70  | 1.76             |
| m      | zeitonline      | media         | 70  | 1.76             |
| m      | uebermedien     | media         | 65  | 1.63             |
| m      | mkreutzfeldt    | nonddj_jor    | 63  | 1.58             |
| m      | niggi           | nonddj_jor    | 62  | 1.56             |
| m      | br_data         | media         | 61  | 1.53             |
| m      | nzz             | media         | 59  | 1.48             |
| m      | halukamb        | ddj_jor       | 58  | 1.46             |
| m      | datawrapper     | visual        | 57  | 1.43             |
| m      | chelm           | ddj_jor       | 56  | 1.41             |
| m      | s_muellerhansen | ddj_jor       | 54  | 1.36             |
| m      | datentaeterin   | ddj_jor       | 50  | 1.26             |
| m      | nrecherche      | ngo           | 49  | 1.23             |
| m      | funkeinteraktiv | media         | 48  | 1.21             |
| m      | elhotzo         | Others        | 47  | 1.18             |
| m      | jburnmurdoch    | foreign_media | 47  | 1.18             |
| m      | shengfui        | nonddj_jor    | 45  | 1.13             |
| m      | br_recherche    | media         | 44  | 1.10             |
| m      | karl_lauterbach | politic       | 43  | 1.08             |
| m      | az_augsburg     | media         | 42  | 1.05             |
| m      | sz              | media         | 41  | 1.03             |
| m      | larswienand     | nonddj_jor    | 41  | 1.03             |
| m      | the_claus       | ddj_jor       | 39  | 0.98             |
| m      | fragdenstaat    | ngo           | 38  | 0.95             |

| Gender | Hashtag        | Category      | n  | Share in percent |
|--------|----------------|---------------|----|------------------|
| m      | twone2         | Others        | 37 | 0.93             |
| m      | plateauton     | ddj_jor       | 37 | 0.93             |
| m      | derspiegel     | media         | 37 | 0.93             |
| m      | lisacrost      | ddj_jor       | 36 | 0.90             |
| m      | kakape         | nonddj_jor    | 36 | 0.90             |
| m      | tran_vominhthu | nonddj_jor    | 36 | 0.90             |
| m      | annabehrend    | ddj_jor       | 35 | 0.88             |
| m      | journocode     | ngo           | 35 | 0.88             |
| m      | erichaschi     | nonddj_jor    | 35 | 0.88             |
| m      | erictopol      | nonddj_jor    | 35 | 0.88             |
| m      | c_drosten      | science       | 35 | 0.88             |
| m      | _vanessavu     | nonddj_jor    | 34 | 0.85             |
| m      | fiete_stegers  | nonddj_jor    | 33 | 0.83             |
| m      | jsachse        | nonddj_jor    | 33 | 0.83             |
| m      | m_grill        | nonddj_jor    | 33 | 0.83             |
| m      | michaelkreil   | ddj_jor       | 32 | 0.80             |
| m      | maartenzam     | foreign_media | 32 | 0.80             |
| m      | francozotta    | nonddj_jor    | 32 | 0.80             |
| m      | jaschensky     | nonddj_jor    | 32 | 0.80             |
| m      | hdambeck       | ddj_jor       | 31 | 0.78             |
| m      | munichrocker   | ddj_jor       | 31 | 0.78             |
| m      | jasimmank      | nonddj_jor    | 31 | 0.78             |
| m      | gijn           | ngo           | 30 | 0.75             |
| m      | sarahschierack | nonddj_jor    | 30 | 0.75             |
| m      | mdr_san        | media         | 28 | 0.70             |
| m      | lilithwittmann | ngo           | 28 | 0.70             |
| m      | kollege        | nonddj_jor    | 28 | 0.70             |
| m      | jonathanstray  | science       | 28 | 0.70             |
| m      | webk1d         | visual        | 28 | 0.70             |
| m      | hatr           | ddj_jor       | 27 | 0.68             |
| m      | br_ailab       | media         | 27 | 0.68             |
| m      | felixhuesmann  | nonddj_jor    | 27 | 0.68             |
| m      | stephanpalagan | nonddj_jor    | 27 | 0.68             |
| m      | jangeorgplavec | ddj_jor       | 26 | 0.65             |
| m      | stz_news       | media         | 26 | 0.65             |

| Gender | Hashtag         | Category   | n  | Share in percent |
|--------|-----------------|------------|----|------------------|
| m      | juliusbetschka  | nonddj_jor | 26 | 0.65             |
| m      | jayrosen_nyu    | science    | 26 | 0.65             |
| m      | marcelpauly     | ddj_jor    | 25 | 0.63             |
| m      | stekhn          | ddj_jor    | 25 | 0.63             |
| m      | rbb24           | media      | 25 | 0.63             |
| m      | ardenthistorian | nonddj_jor | 25 | 0.63             |
| m      | laloefelstiel   | nonddj_jor | 25 | 0.63             |
| m      | svensonst       | nonddj_jor | 25 | 0.63             |
| m      | ydillinger      | nonddj_jor | 25 | 0.63             |
| m      | helenawittlich  | ddj_jor    | 24 | 0.60             |
| m      | daniellaufer    | nonddj_jor | 24 | 0.60             |
| m      | t_stoneman      | nonddj_jor | 24 | 0.60             |
| m      | ecmocaragianni1 | science    | 24 | 0.60             |
| m      | tibor           | ddj_jor    | 23 | 0.58             |
| m      | ndmedienmacher  | ngo        | 23 | 0.58             |
| m      | tagesschau      | media      | 22 | 0.55             |
| m      | cieseksandra    | science    | 22 | 0.55             |
| m      | rki_de          | science    | 22 | 0.55             |
| m      | elena_erdmann   | ddj_jor    | 21 | 0.53             |
| m      | simondhaas      | ddj_jor    | 21 | 0.53             |
| m      | zerforschung    | ngo        | 21 | 0.53             |
| m      | flor8i          | nonddj_jor | 21 | 0.53             |
| m      | patrickgensing  | nonddj_jor | 21 | 0.53             |
| m      | opendataddorf   | ngo        | 20 | 0.50             |
| m      | kaibiermann     | nonddj_jor | 20 | 0.50             |
| m      | destatis        | politic    | 20 | 0.50             |
| m      | stollovo        | ddj_jor    | 19 | 0.48             |
| m      | wdraktuell      | media      | 19 | 0.48             |
| m      | a_watch         | ngo        | 19 | 0.48             |
| m      | christianfuchs_ | nonddj_jor | 19 | 0.48             |
| m      | christinaberndt | nonddj_jor | 19 | 0.48             |
| m      | der_rosenkranz  | nonddj_jor | 19 | 0.48             |
| m      | herrmarkusstein | nonddj_jor | 19 | 0.48             |
| m      | nhile_de        | nonddj_jor | 19 | 0.48             |

## Clusters of Hashtags: Political Journalists

| Gender | Hashtag             | Category  | n    | Share in percent (of total<br>in gender) |
|--------|---------------------|-----------|------|------------------------------------------|
| f      | corona              | covid     | 2184 | 14.85                                    |
| f      | sachsen             | elections | 1232 | 8.38                                     |
| f      | btw21               | elections | 786  | 5.34                                     |
| f      | cdu                 | politics  | 750  | 5.10                                     |
| f      | afd                 | politics  | 573  | 3.90                                     |
| f      | covid19             | covid     | 468  | 3.18                                     |
| f      | coronaeltern        | covid     | 386  | 2.62                                     |
| f      | merkel              | politics  | 321  | 2.18                                     |
| f      | laschet             | politics  | 286  | 1.94                                     |
| f      | kidsfirst           | climate   | 280  | 1.90                                     |
| f      | lockdown            | covid     | 262  | 1.78                                     |
| f      | belarus             | politics  | 261  | 1.77                                     |
| f      | impfen              | covid     | 258  | 1.75                                     |
| f      | afghanistan         | politics  | 255  | 1.73                                     |
| f      | staatsversagen      | politics  | 202  | 1.37                                     |
| f      | impftbitteschneller | covid     | 186  | 1.26                                     |
| f      | spd                 | politics  | 186  | 1.26                                     |
| f      | astrazeneca         | covid     | 180  | 1.22                                     |
| f      | ampel               | elections | 176  | 1.20                                     |
| f      | dresden             | Others    | 172  | 1.17                                     |
| f      | biden               | politics  | 163  | 1.11                                     |
| f      | scholz              | politics  | 150  | 1.02                                     |
| f      | berlin              | politics  | 148  | 1.01                                     |
| f      | triell              | elections | 142  | 0.97                                     |
| f      | bundestag           | politics  | 138  | 0.94                                     |
| f      | mpk                 | covid     | 137  | 0.93                                     |
| f      | baerbock            | politics  | 130  | 0.88                                     |
| f      | impfdesaster        | covid     | 125  | 0.85                                     |
| f      | china               | politics  | 125  | 0.85                                     |
| f      | nawalny             | politics  | 124  | 0.84                                     |
| f      | grünen              | politics  | 122  | 0.83                                     |
| f      | fdp                 | politics  | 116  | 0.79                                     |
| f      | bundestagswahl      | elections | 105  | 0.71                                     |

| Gender | Hashtag           | Category  | Share in percent (of total<br>in gender) |      |
|--------|-------------------|-----------|------------------------------------------|------|
|        |                   |           | n                                        |      |
| f      | söder             | politics  | 97                                       | 0.66 |
| f      | usa               | politics  | 93                                       | 0.63 |
| f      | habeck            | politics  | 88                                       | 0.60 |
| f      | impfpflicht       | covid     | 81                                       | 0.55 |
| f      | russland          | politics  | 81                                       | 0.55 |
| f      | trump             | politics  | 81                                       | 0.55 |
| f      | pandemie          | covid     | 80                                       | 0.54 |
| f      | merz              | politics  | 77                                       | 0.52 |
| f      | grüne             | politics  | 76                                       | 0.52 |
| f      | covid             | covid     | 75                                       | 0.51 |
| f      | afdbpt21          | politics  | 75                                       | 0.51 |
| f      | kabul             | politics  | 73                                       | 0.50 |
| f      | union             | politics  | 73                                       | 0.50 |
| f      | impfung           | covid     | 72                                       | 0.49 |
| f      | schulen           | covid     | 72                                       | 0.49 |
| f      | csu               | politics  | 72                                       | 0.49 |
| f      | cdupt21           | politics  | 71                                       | 0.48 |
| f      | cop26             | climate   | 69                                       | 0.47 |
| f      | laschetvssoeder   | elections | 69                                       | 0.47 |
| f      | maußen            | politics  | 67                                       | 0.46 |
| f      | kanzlerkandidatur | elections | 65                                       | 0.44 |
| f      | drittwelle        | covid     | 64                                       | 0.44 |
| f      | klimaschutz       | climate   | 63                                       | 0.43 |
| f      | bananenrepublik   | politics  | 61                                       | 0.41 |
| f      | eu                | politics  | 59                                       | 0.40 |
| f      | spahn             | politics  | 57                                       | 0.39 |
| f      | impfenschützt     | covid     | 56                                       | 0.38 |
| f      | newyork           | Others    | 55                                       | 0.37 |
| f      | daspolitikteil    | politics  | 55                                       | 0.37 |
| f      | impfstoff         | covid     | 54                                       | 0.37 |
| f      | querdenken        | politics  | 54                                       | 0.37 |
| f      | annewill          | politics  | 53                                       | 0.36 |
| f      | klimawandel       | climate   | 52                                       | 0.35 |
| f      | israel            | politics  | 52                                       | 0.35 |

| Gender | Hashtag               | Category   | n     | Share in percent (of total |
|--------|-----------------------|------------|-------|----------------------------|
|        |                       |            |       | in gender)                 |
| f      | tesla                 | politics   | 52    | 0.35                       |
| f      | podcast               | journalism | 51    | 0.35                       |
| f      | dlt21                 | politics   | 51    | 0.35                       |
| f      | kolumbien             | politics   | 51    | 0.35                       |
| f      | pressefreiheit        | journalism | 50    | 0.34                       |
| f      | btw2021               | elections  | 48    | 0.33                       |
| f      | brexit                | politics   | 48    | 0.33                       |
| f      | polizei               | Others     | 47    | 0.32                       |
| f      | ampelkoalition        | elections  | 47    | 0.32                       |
| f      | weltamsonntag         | journalism | 47    | 0.32                       |
| f      | klimakrise            | climate    | 46    | 0.31                       |
| f      | wegenmorgen           | climate    | 46    | 0.31                       |
| f      | impfenschuetzt        | covid      | 45    | 0.31                       |
| f      | ltwbw21               | elections  | 45    | 0.31                       |
| f      | colombia              | politics   | 45    | 0.31                       |
| f      | deutschland           | politics   | 45    | 0.31                       |
| f      | querdenker            | politics   | 45    | 0.31                       |
| f      | us                    | politics   | 45    | 0.31                       |
| f      | ltwsa21               | elections  | 44    | 0.30                       |
| f      | hanau                 | politics   | 43    | 0.29                       |
| f      | polen                 | politics   | 43    | 0.29                       |
| f      | taliban               | politics   | 43    | 0.29                       |
| f      | himmelherrgottnochmal | Others     | 42    | 0.29                       |
| f      | kitas                 | Others     | 42    | 0.29                       |
| f      | kanzlerkandidat       | elections  | 42    | 0.29                       |
| f      | bautzen               | politics   | 42    | 0.29                       |
| f      | nsu                   | politics   | 42    | 0.29                       |
| m      | corona                | covid      | 25638 | 28.89                      |
| m      | coronavirus           | covid      | 3664  | 4.13                       |
| m      | afd                   | politics   | 2359  | 2.66                       |
| m      | sachsen               | elections  | 2349  | 2.65                       |
| m      | cdu                   | politics   | 2160  | 2.43                       |
| m      | laschet               | politics   | 2037  | 2.30                       |
| m      | afghanistan           | politics   | 1840  | 2.07                       |

| Gender | Hashtag                 | Category  | n    | Share in percent (of total<br>in gender) |
|--------|-------------------------|-----------|------|------------------------------------------|
| m      | berlin                  | politics  | 1620 | 1.83                                     |
| m      | nrw                     | Others    | 1616 | 1.82                                     |
| m      | köln                    | Others    | 1582 | 1.78                                     |
| m      | btw21                   | elections | 1455 | 1.64                                     |
| m      | spd                     | politics  | 1206 | 1.36                                     |
| m      | merkel                  | elections | 1120 | 1.26                                     |
| m      | saarland                | elections | 1097 | 1.24                                     |
| m      | ampel                   | elections | 1002 | 1.13                                     |
| m      | fdp                     | politics  | 1000 | 1.13                                     |
| m      | chemnitz                | politics  | 954  | 1.08                                     |
| m      | baerbock                | politics  | 941  | 1.06                                     |
| m      | wirecard                | politics  | 905  | 1.02                                     |
| m      | covid19                 | covid     | 887  | 1.00                                     |
| m      | bundeswehr              | politics  | 809  | 0.91                                     |
| m      | belarus                 | politics  | 780  | 0.88                                     |
| m      | triell                  | elections | 725  | 0.82                                     |
| m      | lockdown                | covid     | 723  | 0.81                                     |
| m      | brandenburg             | elections | 707  | 0.80                                     |
| m      | eu                      | politics  | 700  | 0.79                                     |
| m      | fehlendermindestabstand | covid     | 677  | 0.76                                     |
| m      | grünen                  | politics  | 656  | 0.74                                     |
| m      | scholz                  | politics  | 637  | 0.72                                     |
| m      | csu                     | politics  | 627  | 0.71                                     |
| m      | söder                   | politics  | 626  | 0.71                                     |
| m      | taliban                 | politics  | 617  | 0.70                                     |
| m      | merz                    | politics  | 606  | 0.68                                     |
| m      | dresden                 | Others    | 603  | 0.68                                     |
| m      | turkey                  | politics  | 603  | 0.68                                     |
| m      | bundestag               | politics  | 575  | 0.65                                     |
| m      | kabul                   | politics  | 573  | 0.65                                     |
| m      | polen                   | politics  | 566  | 0.64                                     |
| m      | bundestagswahl          | elections | 556  | 0.63                                     |
| m      | maaißen                 | politics  | 548  | 0.62                                     |
| m      | astrazeneca             | covid     | 544  | 0.61                                     |



| Gender | Hashtag          | Category   | n   | Share in percent (of total<br>in gender) |
|--------|------------------|------------|-----|------------------------------------------|
| m      | impfpflicht      | covid      | 533 | 0.60                                     |
| m      | trump            | politics   | 513 | 0.58                                     |
| m      | germany          | Others     | 510 | 0.57                                     |
| m      | russland         | politics   | 510 | 0.57                                     |
| m      | nordstream2      | politics   | 499 | 0.56                                     |
| m      | pandemie         | covid      | 475 | 0.54                                     |
| m      | habeck           | politics   | 467 | 0.53                                     |
| m      | grüne            | politics   | 458 | 0.52                                     |
| m      | österreich       | politics   | 450 | 0.51                                     |
| m      | deutschland      | politics   | 442 | 0.50                                     |
| m      | cumex            | politics   | 436 | 0.49                                     |
| m      | querdenker       | politics   | 436 | 0.49                                     |
| m      | tesla            | politics   | 435 | 0.49                                     |
| m      | impfung          | covid      | 429 | 0.48                                     |
| m      | handelsblatt     | journalism | 423 | 0.48                                     |
| m      | münchen          | Others     | 414 | 0.47                                     |
| m      | fplus            | journalism | 413 | 0.47                                     |
| m      | china            | politics   | 413 | 0.47                                     |
| m      | annewill         | politics   | 399 | 0.45                                     |
| m      | antisemitismus   | politics   | 380 | 0.43                                     |
| m      | allesdichtmachen | covid      | 377 | 0.42                                     |
| m      | bawü             | politics   | 375 | 0.42                                     |
| m      | putin            | politics   | 374 | 0.42                                     |
| m      | klimaschutz      | climate    | 367 | 0.41                                     |
| m      | mpk              | covid      | 363 | 0.41                                     |
| m      | bitcoin          | politics   | 363 | 0.41                                     |
| m      | ukraine          | politics   | 358 | 0.40                                     |
| m      | sachsenanhalt    | Others     | 353 | 0.40                                     |
| m      | bayern           | Others     | 346 | 0.39                                     |
| m      | weltpolitik      | politics   | 344 | 0.39                                     |
| m      | union            | politics   | 340 | 0.38                                     |
| m      | russia           | politics   | 331 | 0.37                                     |
| m      | israel           | politics   | 320 | 0.36                                     |
| m      | spahn            | politics   | 314 | 0.35                                     |

| Gender | Hashtag        | Category   | n   | Share in percent (of total<br>in gender) |
|--------|----------------|------------|-----|------------------------------------------|
| m      | polizei        | Others     | 313 | 0.35                                     |
| m      | impfstoff      | covid      | 311 | 0.35                                     |
| m      | hamburg        | Others     | 308 | 0.35                                     |
| m      | querdenken     | politics   | 295 | 0.33                                     |
| m      | omikron        | covid      | 294 | 0.33                                     |
| m      | poland         | politics   | 293 | 0.33                                     |
| m      | biden          | politics   | 290 | 0.33                                     |
| m      | pegasusproject | Others     | 285 | 0.32                                     |
| m      | cdupt21        | politics   | 280 | 0.32                                     |
| m      | impfen         | covid      | 268 | 0.30                                     |
| m      | thüringen      | Others     | 266 | 0.30                                     |
| m      | japan          | politics   | 264 | 0.30                                     |
| m      | myanmar        | politics   | 264 | 0.30                                     |
| m      | mietendeckel   | politics   | 262 | 0.30                                     |
| m      | breaking       | journalism | 259 | 0.29                                     |
| m      | muenchen       | Others     | 238 | 0.27                                     |
| m      | cuxhaven       | Others     | 235 | 0.26                                     |
| m      | niedersachsen  | Others     | 235 | 0.26                                     |
| m      | lauterbach     | politics   | 235 | 0.26                                     |
| m      | nawalny        | politics   | 235 | 0.26                                     |
| m      | ampelkoalition | elections  | 232 | 0.26                                     |
| m      | nsu            | politics   | 232 | 0.26                                     |

### Clusters of Hashtags: Data Journalists

| Gender | Hashtag      | Category  | n   | Share in percent |
|--------|--------------|-----------|-----|------------------|
| f      | ddj          | ddj       | 304 | 21.08            |
| f      | corona       | covid     | 152 | 10.54            |
| f      | btw21        | elections | 96  | 6.66             |
| f      | covid19      | covid     | 84  | 5.83             |
| f      | dataviz      | ddj       | 50  | 3.47             |
| f      | scicar21     | ddj       | 46  | 3.19             |
| f      | kantonsratlu | elections | 31  | 2.15             |
| f      | ki           | politics  | 26  | 1.80             |
| f      | kolumbien    | politics  | 25  | 1.73             |

| Gender | Hashtag           | Category   | n  | Share in percent |
|--------|-------------------|------------|----|------------------|
| f      | coronavirus       | covid      | 24 | 1.66             |
| f      | annewill          | politics   | 24 | 1.66             |
| f      | swrxlab           | journalism | 22 | 1.53             |
| f      | storytelling      | journalism | 18 | 1.25             |
| f      | eid               | politics   | 18 | 1.25             |
| f      | mentalhealth      | Others     | 16 | 1.11             |
| f      | scicar            | ddj        | 16 | 1.11             |
| f      | ai                | politics   | 16 | 1.11             |
| f      | astrazeneca       | covid      | 15 | 1.04             |
| f      | nannenpreis       | journalism | 15 | 1.04             |
| f      | argentinien       | politics   | 15 | 1.04             |
| f      | klimakrise        | climate    | 13 | 0.90             |
| f      | laschet           | politics   | 13 | 0.90             |
| f      | triell            | elections  | 12 | 0.83             |
| f      | afghanistan       | politics   | 11 | 0.76             |
| f      | impfung           | covid      | 10 | 0.69             |
| f      | berlin            | politics   | 10 | 0.69             |
| f      | hamburg           | Others     | 9  | 0.62             |
| f      | pandemie          | covid      | 9  | 0.62             |
| f      | koalitionsvertrag | elections  | 9  | 0.62             |
| f      | brasilien         | politics   | 9  | 0.62             |
| f      | deutschland       | politics   | 9  | 0.62             |
| f      | cities4rent       | Others     | 8  | 0.55             |
| f      | klimawandel       | climate    | 8  | 0.55             |
| f      | delta             | covid      | 8  | 0.55             |
| f      | omikron           | covid      | 8  | 0.55             |
| f      | journalismus      | journalism | 8  | 0.55             |
| f      | eurovision        | Others     | 7  | 0.49             |
| f      | polizei           | Others     | 7  | 0.49             |
| f      | cop26             | climate    | 7  | 0.49             |
| f      | nr21              | ddj        | 7  | 0.49             |
| f      | journalismai      | journalism | 7  | 0.49             |
| f      | cdu               | politics   | 7  | 0.49             |
| f      | cumex             | politics   | 7  | 0.49             |
| f      | b117              | covid      | 6  | 0.42             |

| Gender | Hashtag            | Category   | n | Share in percent |
|--------|--------------------|------------|---|------------------|
| f      | covid              | covid      | 6 | 0.42             |
| f      | datenjournalismus  | ddj        | 6 | 0.42             |
| f      | berlinomat         | elections  | 6 | 0.42             |
| f      | sdv21              | journalism | 6 | 0.42             |
| f      | bolsonaro          | politics   | 6 | 0.42             |
| f      | lanz               | politics   | 6 | 0.42             |
| f      | merkel             | politics   | 6 | 0.42             |
| f      | sachsen            | politics   | 6 | 0.42             |
| f      | lieferando         | Others     | 5 | 0.35             |
| f      | lucaapp            | covid      | 5 | 0.35             |
| f      | sarscov2           | covid      | 5 | 0.35             |
| f      | opensource         | ddj        | 5 | 0.35             |
| f      | osint              | ddj        | 5 | 0.35             |
| f      | webscraping        | ddj        | 5 | 0.35             |
| f      | bundestagswahl2021 | elections  | 5 | 0.35             |
| f      | pegasusproject     | journalism | 5 | 0.35             |
| f      | cali               | politics   | 5 | 0.35             |
| f      | colombia           | politics   | 5 | 0.35             |
| f      | mpk                | politics   | 5 | 0.35             |
| f      | taliban            | politics   | 5 | 0.35             |
| f      | clubhouse          | Others     | 4 | 0.28             |
| f      | frauensession2021  | Others     | 4 | 0.28             |
| f      | kalkspaceleaks     | Others     | 4 | 0.28             |
| f      | pmt                | Others     | 4 | 0.28             |
| f      | schlussrunde       | Others     | 4 | 0.28             |
| f      | klimaschutz        | climate    | 4 | 0.28             |
| f      | klimastreik        | climate    | 4 | 0.28             |
| f      | allenichtganzdicht | covid      | 4 | 0.28             |
| f      | covid              | covid      | 4 | 0.28             |
| f      | impfstoff          | covid      | 4 | 0.28             |
| f      | impfungen          | covid      | 4 | 0.28             |
| f      | lockdown           | covid      | 4 | 0.28             |
| f      | daten              | ddj        | 4 | 0.28             |
| f      | abst21             | elections  | 4 | 0.28             |
| f      | wahlkampf          | elections  | 4 | 0.28             |

| Gender | Hashtag            | Category   | n    | Share in percent |
|--------|--------------------|------------|------|------------------|
| f      | djvbo              | journalism | 4    | 0.28             |
| f      | gijc21             | journalism | 4    | 0.28             |
| f      | lokaljournalismus  | journalism | 4    | 0.28             |
| f      | panamapapers       | journalism | 4    | 0.28             |
| f      | podcast            | journalism | 4    | 0.28             |
| f      | storyday21         | journalism | 4    | 0.28             |
| f      | swr                | journalism | 4    | 0.28             |
| f      | afd                | politics   | 4    | 0.28             |
| f      | angelamerkel       | politics   | 4    | 0.28             |
| f      | bundestag          | politics   | 4    | 0.28             |
| f      | istanbulkonvention | politics   | 4    | 0.28             |
| f      | soscolombia        | politics   | 4    | 0.28             |
| f      | union              | politics   | 4    | 0.28             |
| m      | ddj                | ddj        | 1060 | 15.89            |
| m      | corona             | covid      | 958  | 14.36            |
| m      | covid19            | covid      | 552  | 8.27             |
| m      | btw21              | elections  | 514  | 7.70             |
| m      | opendata           | ddj        | 354  | 5.31             |
| m      | laschet            | politics   | 222  | 3.33             |
| m      | b117               | covid      | 162  | 2.43             |
| m      | dataviz            | ddj        | 148  | 2.22             |
| m      | coronavirus        | covid      | 140  | 2.10             |
| m      | cdu                | politics   | 126  | 1.89             |
| m      | scicar21           | ddj        | 110  | 1.65             |
| m      | wirecard           | politics   | 95   | 1.42             |
| m      | triell             | elections  | 94   | 1.41             |
| m      | 30daymapchallenge  | ddj        | 75   | 1.12             |
| m      | datenjournalismus  | ddj        | 74   | 1.11             |
| m      | omikron            | covid      | 63   | 0.94             |
| m      | klimakrise         | climate    | 56   | 0.84             |
| m      | pandemie           | covid      | 56   | 0.84             |
| m      | sarscov2           | covid      | 55   | 0.82             |
| m      | astrazeneca        | covid      | 53   | 0.79             |
| m      | afd                | politics   | 52   | 0.78             |
| m      | berlin             | politics   | 48   | 0.72             |

| Gender | Hashtag                   | Category   | n  | Share in percent |
|--------|---------------------------|------------|----|------------------|
| m      | impfung                   | covid      | 43 | 0.64             |
| m      | osint                     | ddj        | 42 | 0.63             |
| m      | pegasusproject            | journalism | 39 | 0.58             |
| m      | afghanistan               | politics   | 39 | 0.58             |
| m      | hospitalisierungsinzidenz | covid      | 38 | 0.57             |
| m      | bundestagswahl            | elections  | 36 | 0.54             |
| m      | euro2020                  | sports     | 35 | 0.52             |
| m      | lucaapp                   | covid      | 34 | 0.51             |
| m      | uecl                      | sports     | 33 | 0.49             |
| m      | cop26                     | climate    | 31 | 0.46             |
| m      | coronadaten               | covid      | 31 | 0.46             |
| m      | sachsen                   | elections  | 31 | 0.46             |
| m      | wissenschaftsjournalismus | journalism | 31 | 0.46             |
| m      | superleague               | sports     | 31 | 0.46             |
| m      | djvbo                     | journalism | 28 | 0.42             |
| m      | impfungen                 | covid      | 27 | 0.40             |
| m      | inzidenz                  | covid      | 27 | 0.40             |
| m      | rki                       | covid      | 27 | 0.40             |
| m      | augsburg                  | Others     | 26 | 0.39             |
| m      | tuesdayquiz               | Others     | 26 | 0.39             |
| m      | stuttgart1942             | ddj        | 25 | 0.37             |
| m      | ki                        | politics   | 25 | 0.37             |
| m      | marsalek                  | politics   | 25 | 0.37             |
| m      | klimaschutz               | climate    | 24 | 0.36             |
| m      | schnelltests              | covid      | 24 | 0.36             |
| m      | ddjbw                     | ddj        | 24 | 0.36             |
| m      | wednesdayquiz             | Others     | 23 | 0.34             |
| m      | impfbot                   | covid      | 23 | 0.34             |
| m      | scicar                    | ddj        | 23 | 0.34             |
| m      | btw2021                   | elections  | 23 | 0.34             |
| m      | ltwsa21                   | elections  | 23 | 0.34             |
| m      | nr_ddj                    | ddj        | 22 | 0.33             |
| m      | jotcon21                  | ddj        | 21 | 0.31             |
| m      | rstats                    | ddj        | 21 | 0.31             |
| m      | ltwbw21                   | elections  | 21 | 0.31             |

| Gender | Hashtag          | Category   | n  | Share in percent |
|--------|------------------|------------|----|------------------|
| m      | journalismus     | journalism | 21 | 0.31             |
| m      | ai               | politics   | 21 | 0.31             |
| m      | deutschland      | Others     | 20 | 0.30             |
| m      | b1617            | covid      | 20 | 0.30             |
| m      | delta            | covid      | 20 | 0.30             |
| m      | nannenpreis      | journalism | 20 | 0.30             |
| m      | facebook         | Others     | 19 | 0.28             |
| m      | nrw              | Others     | 19 | 0.28             |
| m      | impfen           | covid      | 19 | 0.28             |
| m      | ifg              | ddj        | 19 | 0.28             |
| m      | innoday21        | journalism | 19 | 0.28             |
| m      | tiktok           | Others     | 18 | 0.27             |
| m      | klimawandel      | climate    | 17 | 0.25             |
| m      | nocovid          | covid      | 17 | 0.25             |
| m      | omicron          | covid      | 17 | 0.25             |
| m      | baerbock         | politics   | 17 | 0.25             |
| m      | impfquote        | covid      | 16 | 0.24             |
| m      | longcovid        | covid      | 16 | 0.24             |
| m      | daten            | ddj        | 16 | 0.24             |
| m      | sachsenanhalt    | elections  | 16 | 0.24             |
| m      | kabul            | politics   | 16 | 0.24             |
| m      | spahn            | politics   | 16 | 0.24             |
| m      | clubhouse        | Others     | 15 | 0.22             |
| m      | impfstoff        | covid      | 15 | 0.22             |
| m      | ltwlsa           | elections  | 15 | 0.22             |
| m      | cumex            | politics   | 15 | 0.22             |
| m      | fdp              | politics   | 15 | 0.22             |
| m      | porger           | sports     | 15 | 0.22             |
| m      | tokyo2020        | sports     | 15 | 0.22             |
| m      | ipcc             | climate    | 14 | 0.21             |
| m      | booster          | covid      | 14 | 0.21             |
| m      | lockdown         | covid      | 14 | 0.21             |
| m      | codingdavinci    | ddj        | 14 | 0.21             |
| m      | spd              | politics   | 14 | 0.21             |
| m      | 7zentimetermessi | sports     | 14 | 0.21             |
| m      | ucl              | sports     | 14 | 0.21             |
